# Supplementary material for: Cuproptosis-related gene SLC31A1: prognosis values and potential biological functions in cancer
Source: Springer Nature journal article supplement (doi:10.1038/s41598-023-44681-8), 2023-10-18
Supplement: MOESM1 [file 41598_2023_44681_MOESM1_ESM.pdf]

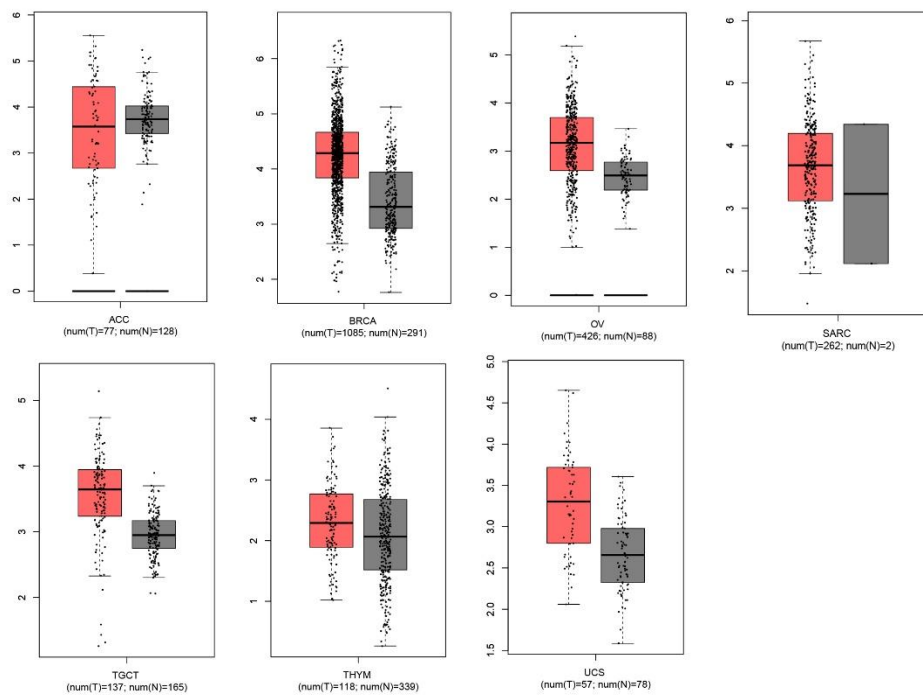

**Figure S1 The expression of SLC31A1 from TCGA and GTEX in ACC, BRCA, OV, SARC, TGCT, THYM and UCS.**
