# Supplementary material for: Cuproptosis-related gene SLC31A1: prognosis values and potential biological functions in cancer
Source: Springer Nature journal article supplement (doi:10.1038/s41598-023-44681-8), 2023-10-18
Supplement: MOESM2 [file 41598_2023_44681_MOESM2_ESM.pdf]

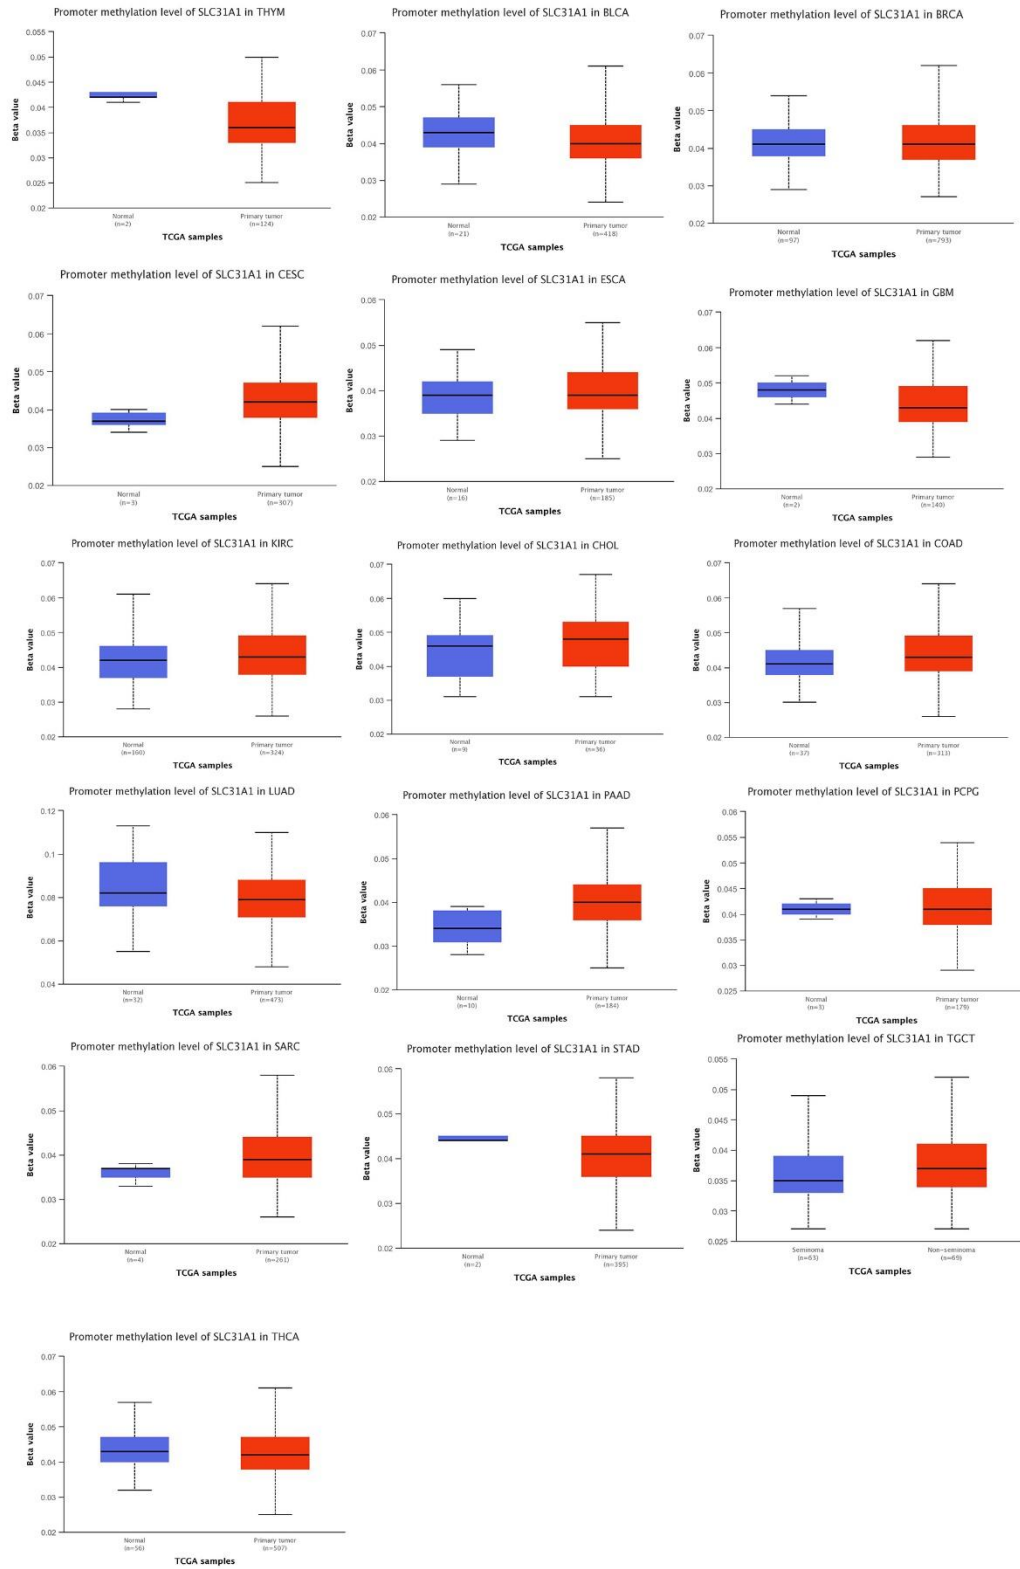

**Figure S2 DNA promoter methylation of SLC31A1 in pan-cancer between normal and primary tumor tissues by UALCAN.**
