# Supplementary material for: Cuproptosis-related gene SLC31A1: prognosis values and potential biological functions in cancer
Source: Sci Rep. 2023 Oct 18;13:17790. doi: 10.1038/s41598-023-44681-8 (PMC10584849; doi:10.1038/s41598-023-44681-8)
Supplement: Supplementary file 3 — Supplementary Table S1. [file 41598_2023_44681_MOESM3_ESM.xlsx]

## Sheet: Sheet1
supplementary table S1： The top 100 SLC31A1 co-expressed genes
CYB561	1
CHGB	2
EML5	3
DBH	4
TBX20	5
PHOX2B	6
SLC6A2	7
LINC00682	8
RP11-269G24.4	9
SURF4	10
MAB21L1	11
GCH1	12
CHGA	13
RP11-415I12.2	14
CHRNA3	15
TH	16
HAND2-AS1	17
CHRNB4	18
KCNG4	19
C18orf42	20
RIMBP2	21
HAND2	22
TTC8	23
RP11-662M24.2	24
DRD2	25
HTATSF1	26
RP11-561B11.6	27
SLC18A1	28
DDC	29
PROKR1	30
OCRL	31
RP11-124O11.1	32
RP11-481F24.3	33
SEZ6L2	34
SYT4	35
DGKK	36
RP11-227F19.1	37
TLX2	38
HACD3	39
CAMK4	40
CFAP20	41
UBQLN1	42
MRAP2	43
SCG2	44
PTPRN2	45
RP11-976B16.1	46
ERLEC1	47
SLC18A2	48
FAM163A	49
COG5	50
L1CAM	51
ATP6V1G1	52
RBM18	53
PHOX2A	54
CDK5R2	55
TMX4	56
DSTNP5	57
RP11-429O1.1	58
RAB3C	59
RP11-159N11.3	60
TMEM63C	61
GPR107	62
JKAMP	63
DNAJC3	64
RP11-17A4.2	65
ALG2	66
CALM2	67
FAIM2	68
LL09NC01-254D11.1	69
RET	70
HAND1	71
FAM163B	72
RP11-814P5.1	73
G3BP2	74
SPOCK3	75
VPS33A	76
SHC1	77
ARFGEF3	78
DRGX	79
SLC35D3	80
UMAD1	81
CTC-340D7.1	82
PRLHR	83
YIPF6	84
TNPO1	85
SHF	86
RP5-967N21.2	87
CHUK	88
BEGAIN	89
INSM2	90
RP11-475B2.1	91
QDPR	92
CELF3	93
INIP	94
RP11-12M5.3	95
GPR22	96
ZDBF2	97
MAB21L2	98
PRPF4	99
TM9SF2	100
